# Supplementary material for: Newly Designed Human-Like Collagen to Maximize Sensitive Release of BMP-2 for Remarkable Repairing of Bone Defects
Source: PubMed Central journal article supplement (PMC6769454; doi:10.3390/biom9090450), 2019-09-04
Supplement: biomolecules-09-00450-s001.pdf [file biomolecules-09-00450-s001.pdf]

## Supplementary Materials

### Article

# Newly Designed Human-like Collagen to Maximize Sensitive Release of BMP-2 for Markedly Repairing of Bone Defect

Zhuoyue Chen<sup>1,2</sup>, Zhen Zhang<sup>1</sup>, Xiaoxuan Ma<sup>2</sup>, Zhiguang Duan<sup>2</sup>, Junfeng Hui<sup>2</sup>, Chenhui Zhu<sup>2</sup>, Donggang Zhang<sup>3</sup>, Daidi Fan<sup>2\*</sup>, Lijun Shang<sup>4\*</sup>, Fulin Chen<sup>1\*</sup>

<sup>1</sup>Provincial Key Laboratory of Biotechnology of Shaanxi; Key Laboratory of Resource Biology and Modern Biotechnology in Western China, Ministry of Education; Northwest University, 229 TaiBai North Road, Xi'an, Shaanxi Province 710069, P.R. China;

<sup>2</sup>Shaanxi Key Laboratory of Degradable Biomedical Materials; Shaanxi R&D Center of Biomaterial and Fermentation Engineering; School of Chemical Engineering, Northwest University, 229 TaiBai North Road, Xi'an, Shaanxi Province 710069, P.R. China;

<sup>3</sup>Yantai Zhenghai Biotechnology Co, Ltd., 10 Hengshan Road, Yantai Economic & Technological Development Area, Yantai, Shandong Province 264000, P.R. China;

<sup>4</sup>School of Chemistry and Biosciences, Faculty of Life Sciences, University of Bradford, Bradford, BD7 1DP, UK;

\*Correspondence: [fandaidi@nwu.edu.cn](mailto:fandaidi@nwu.edu.cn); +86-29-88302632 (D. D. Fan); [l.shang1@bradford.ac.uk](mailto:l.shang1@bradford.ac.uk); +44-1274-234676 (L. Shang); [chenfl@nwu.edu.cn](mailto:chenfl@nwu.edu.cn); 86029-88302411 (F. L. Chen)

**Figure S1. Mercury porosimetry report of the HLC scaffold** The porosity of the HLC scaffold was over 99%

**Figure S2. Micro-CT images of the rat cranial defect repair** Micro-CT images of control, HLC and HLC-BMP implants groups

**Table S1.** Expression of the recombinant human-like collagens

**Table S2.** Original data of rhBMP-2 Release Kinetics.

**Table S3.** Original data of quantitative estimation of OPN and Runx-2 expression in each implant 2 weeks and 4 weeks after implantation.

**Table S4.** Original data of quantitative estimation of OPN and Runx-2 expression in each implant 8 weeks after implantation.

**Table S5.** Comparison the commercial collagen sponge and the recombinant human-like collagen sponge



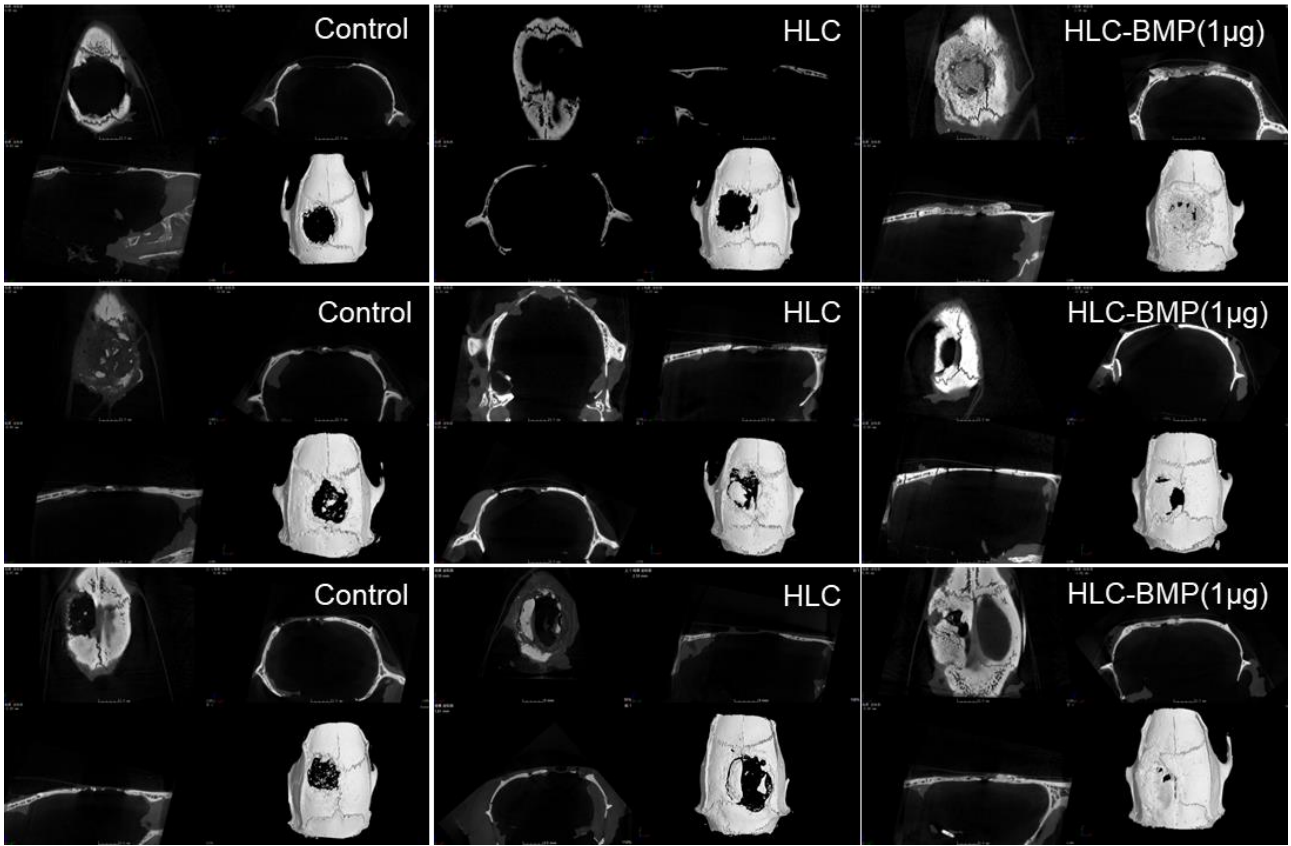

**Figure S2. Micro-CT images of the rat cranial defect repair** Micro-CT images of control, HLC and HLC-BMP implants groups

**Table S1. Expression of the recombinant human-like collagens**

| Host                         | Yield                        | Molecular Wt. | Ref.                             |
|------------------------------|------------------------------|---------------|----------------------------------|
| <i>E. coli</i> origami (DE3) | 260 mg/L in a 10 L fermentor | 35 kDa        | Tang <i>et al.</i> <sup>1</sup>  |
| <i>E. coli</i> Rosetta (DE3) | Shake flask culture          | 40 kDa        | Yang <i>et al.</i> <sup>2</sup>  |
| <i>E. coli</i> BL21 (DE3)    | 14 g/L in a 500 L fermentor  | 93 kDa        | Fan <i>et al.</i> <sup>3,4</sup> |

(1). Tang, Y.; Yang, X.; Hang, B.; Li, J.; Huang, L.; Huang, F.; Xu, Z. Efficient Production of Hydroxylated Human-Like Collagen Via the Co-Expression of Three Key Genes in Escherichia coli Origami (DE3). *Applied Biochemistry & Biotechnology* 2016, 178, 1458-1470.

(2). Yang, J.; Jie-Ying, Y. U.; Wang, M.; Shao-Min, W. U.; Yi, M. A.; Wang, J. F. Expression, Purification, and Functional Characterization of Recombinant Human-Like Type i Collagen Peptide in E.coli. *Modern Food Science & Technology* 2016.

(3). Fan, D. D.; Luo, Y.; Mi, Y.; Ma, X. X.; Shang, L. Characteristics of Fed-Batch Cultures of Recombinant Escherichia Coli Containing Human-Like Collagen cDNA at Different Specific Growth Rates. *Biotechnology Letters* 2005, 27, 865-870.

(4). Zhu, C.; Fan, D.; Duan, Z.; Xue, W.; Shang, L.; Chen, F.; Luo, Y. Initial Investigation of Novel Human-Like Collagen/Chitosan Scaffold for Vascular Tissue Engineering. *Journal of Biomedical Materials Research Part a* 2010, 89A, 829-840.

**Table S2. Original data of rhBMP-2 Release Kinetics.** Day 1~3: Burst release period; Day 3~28 and later: Sustained release period. The percentage of rhBMP-2 release is no difference among loading with different dose rhBMP-2 groups at each time point ( $p > 0.05$ ,  $n=4$ ).

| <b>Time (Days)</b> | <b>HLC-BMP 1<math>\mu</math>g (%)</b> |       |       |       | <b>Average</b> | <b>STD</b> |
|--------------------|---------------------------------------|-------|-------|-------|----------------|------------|
| 1                  | 11.75                                 | 9.47  | 7.96  | 9.78  | 9.74           | 1.56       |
| 2                  | 13.60                                 | 8.66  | 14.75 | 14.47 | 12.87          | 2.85       |
| 3                  | 16.80                                 | 19.57 | 15.58 | 20.59 | 18.13          | 2.34       |
| 5                  | 44.77                                 | 26.78 | 34.68 | 29.88 | 34.03          | 7.86       |
| 7                  | 35.76                                 | 36.80 | 37.60 | 42.69 | 38.21          | 3.08       |
| 14                 | 43.57                                 | 40.70 | 40.68 | 46.59 | 42.88          | 2.82       |
| 21                 | 32.85                                 | 44.46 | 56.54 | 41.73 | 43.89          | 9.78       |
| 28                 | 40.79                                 | 45.69 | 58.69 | 33.99 | 44.79          | 10.43      |
| <b>Time (Days)</b> | <b>HLC-BMP 2<math>\mu</math>g (%)</b> |       |       |       | <b>Average</b> | <b>STD</b> |
| 1                  | 15.65                                 | 8.57  | 14.48 | 9.64  | 12.09          | 3.50       |
| 2                  | 19.69                                 | 15.77 | 19.58 | 16.76 | 17.95          | 1.99       |
| 3                  | 17.54                                 | 15.58 | 23.77 | 25.80 | 20.67          | 4.89       |
| 5                  | 46.67                                 | 29.68 | 31.70 | 39.81 | 36.96          | 7.81       |
| 7                  | 51.57                                 | 39.55 | 40.76 | 32.68 | 41.14          | 7.81       |
| 14                 | 41.80                                 | 46.64 | 42.55 | 50.57 | 45.39          | 4.05       |
| 21                 | 45.66                                 | 50.46 | 42.67 | 44.65 | 45.86          | 3.31       |
| 28                 | 50.43                                 | 43.90 | 49.12 | 40.32 | 45.94          | 4.69       |
| <b>Time (Days)</b> | <b>HLC-BMP 3<math>\mu</math>g (%)</b> |       |       |       | <b>Average</b> | <b>STD</b> |
| 1                  | 9.56                                  | 8.65  | 13.77 | 15.86 | 11.96          | 3.43       |
| 2                  | 17.85                                 | 15.80 | 10.57 | 9.68  | 13.47          | 3.97       |
| 3                  | 23.90                                 | 22.75 | 21.85 | 17.70 | 21.55          | 2.70       |
| 5                  | 34.55                                 | 36.80 | 35.46 | 40.70 | 36.88          | 2.71       |
| 7                  | 45.60                                 | 38.59 | 34.79 | 39.90 | 39.72          | 4.48       |
| 14                 | 45.89                                 | 36.78 | 49.59 | 42.77 | 43.76          | 5.42       |
| 21                 | 45.85                                 | 40.78 | 54.86 | 42.09 | 45.90          | 6.35       |
| 28                 | 43.87                                 | 50.45 | 44.86 | 47.98 | 46.79          | 3.00       |
| <b>Time (Days)</b> | <b>HLC-BMP 4<math>\mu</math>g (%)</b> |       |       |       | <b>Average</b> | <b>STD</b> |
| 1                  | 16.58                                 | 18.59 | 9.48  | 15.47 | 15.03          | 3.92       |
| 2                  | 16.69                                 | 17.69 | 22.46 | 17.58 | 18.61          | 2.61       |

|                    |                                       |       |       |       |                |            |
|--------------------|---------------------------------------|-------|-------|-------|----------------|------------|
| 3                  | 27.54                                 | 18.40 | 26.50 | 19.70 | 23.04          | 4.65       |
| 5                  | 39.35                                 | 36.65 | 39.33 | 38.54 | 38.47          | 1.27       |
| 7                  | 42.37                                 | 38.16 | 38.50 | 39.59 | 39.66          | 1.91       |
| 14                 | 45.48                                 | 49.84 | 48.27 | 48.37 | 47.99          | 1.82       |
| 21                 | 47.80                                 | 47.80 | 49.77 | 47.68 | 48.26          | 1.01       |
| 28                 | 51.69                                 | 49.78 | 50.59 | 39.70 | 47.94          | 5.55       |
| <b>Time (Days)</b> | <b>HLC-BMP 5<math>\mu</math>g (%)</b> |       |       |       | <b>Average</b> | <b>STD</b> |
| 1                  | 16.58                                 | 18.59 | 9.48  | 15.47 | 15.03          | 3.92       |
| 2                  | 16.69                                 | 17.69 | 22.46 | 17.58 | 18.61          | 2.61       |
| 3                  | 27.54                                 | 18.40 | 26.50 | 19.70 | 23.04          | 4.65       |
| 5                  | 39.35                                 | 36.65 | 39.33 | 38.54 | 38.47          | 1.27       |
| 7                  | 42.37                                 | 38.16 | 38.50 | 39.59 | 39.66          | 1.91       |
| 14                 | 45.48                                 | 49.84 | 48.27 | 48.37 | 47.99          | 1.82       |
| 21                 | 45.80                                 | 55.80 | 49.77 | 43.68 | 48.76          | 5.33       |
| 28                 | 59.69                                 | 39.78 | 43.59 | 49.70 | 48.19          | 8.69       |

**Table S3. Original data of quantitative estimation of OPN and Runx-2 expression in each implant 2 weeks and 4 weeks after implantation.**

| <b>Time (weeks)/group</b> |         | <b>OPN (%)</b>    |       |       | <b>Average</b> | <b>STD</b> |
|---------------------------|---------|-------------------|-------|-------|----------------|------------|
| 2                         | Control | 0.00              | 0.00  | 0.00  | 0.00           | 0.00       |
|                           | HLC     | 0.00              | 0.00  | 0.00  | 0.00           | 0.00       |
|                           | HLC-BMP | 21.07             | 14.13 | 18.77 | 17.99          | 3.54       |
| 4                         | Control | 0.00              | 0.00  | 0.00  | 0.00           | 0.00       |
|                           | HLC     | 0.26              | 0.18  | 0.24  | 0.23           | 0.04       |
|                           | HLC-BMP | 24.77             | 16.61 | 22.07 | 21.15          | 4.16       |
| <b>Time (weeks)/group</b> |         | <b>Runx-2 (%)</b> |       |       | <b>Average</b> | <b>STD</b> |
| 2                         | Control | 0.00              | 0.00  | 0.00  | 0.00           | 0.00       |
|                           | HLC     | 0.00              | 0.00  | 0.00  | 0.00           | 0.00       |
|                           | HLC-BMP | 4.97              | 3.33  | 4.43  | 4.25           | 0.83       |
| 4                         | Control | 0.00              | 0.00  | 0.00  | 0.00           | 0.00       |
|                           | HLC     | 0.31              | 0.21  | 0.27  | 0.26           | 0.05       |
|                           | HLC-BMP | 8.60              | 5.77  | 7.67  | 7.35           | 1.44       |



**Table S4. Original data of quantitative estimation of OPN and Runx-2 expression in each implant 8 weeks after implantation.**

| <b>Group</b>         | <b>OPN (%)</b>    |       |       | <b>Average</b> | <b>STD</b> |
|----------------------|-------------------|-------|-------|----------------|------------|
| Control              | 0.09              | 0.06  | 0.08  | 0.08           | 0.02       |
| HLC- 1µg BMP-2 dimer | 35.60             | 23.87 | 31.72 | 30.39          | 5.98       |
| HLC- 5µg BMP-2 dimer | 43.98             | 29.48 | 39.18 | 37.55          | 7.38       |
| <b>Group</b>         | <b>Runx-2 (%)</b> |       |       | <b>Average</b> | <b>STD</b> |
| Control              | 0.43              | 0.29  | 0.38  | 0.36           | 0.07       |
| HLC- 1µg BMP-2 dimer | 18.66             | 12.51 | 16.62 | 15.93          | 3.13       |
| HLC- 5µg BMP-2 dimer | 23.75             | 15.92 | 21.16 | 20.27          | 3.99       |

**Table S5. Comparison the commercial collagen sponge and the recombinant human-like collagen sponge**

| Source                                                  | Company                                           | Release rate                                                                                                                                                                                                                                    | Effect                                                                                                                                                                                                                                          |
|---------------------------------------------------------|---------------------------------------------------|-------------------------------------------------------------------------------------------------------------------------------------------------------------------------------------------------------------------------------------------------|-------------------------------------------------------------------------------------------------------------------------------------------------------------------------------------------------------------------------------------------------|
| bovine achilles tendon -extracted collagen <sup>5</sup> | Helistat®, Integra Life Sciences Corporation, USA | 5 µg BMP-2 dose group released 55.46 ± 2.01% within 1 hour, 84.94 ± 8.68% within 1 day, and 100% at day 2. The 1 µg BMP-2 group released 34.73 ± 8.25% within 6 hours, and 45% at the third day.                                                | The collagen sponge containing 1 µg BMP-2 formed the new bone volume was 0.6 ± 0.3 mm <sup>3</sup> at 8 weeks post-implantation into the rat muscle bag.                                                                                        |
| recombinant from <i>E. coli</i>                         | Our lab.                                          | HLC containing 5 µg BMP-2 gel released 15.03 ± 3.92% of BMP-2 at day 1, 18.61 ± 2.61% at day 2 and 48.19 ± 8.69% at day 28. The HLC containing 1 µg BMP-2 released 9.74 ± 1.56% at day 1, 18.13 ± 2.34% at day 3, and 44.79 ± 10.43% at day 28. | Using the similar rat cranial defect repair model, the repair rate is 65.21 ± 4.44% at 2 weeks postoperatively. At 4 weeks postoperatively, cranial defect repair rate of the designed HLC loaded with 1 µg BMP-2 group achieved 79.95 ± 7.57%. |
| bovine skin -extracted collagen <sup>6</sup>            | I-PC, Koken Co. Ltd. Tokyo, Japan                 | Collagen gel containing 60 µg of BMP-2 released 6% of BMP-2 at day 1. About 33% of the total BMP-2 was released from the collagen gel within 15 days.                                                                                           | None of the new bone tissue appeared in the mouse cranial defect area at 2 weeks postoperatively. At 4 weeks postoperatively, the cranial defect repair rate of the commercial sponge loaded with almost 1 µg BMP-2 group was 40.24 ± 9.70%.    |

(5). Bhakta, G.; Lim, Z. X. H.; Rai, B.; Lin, T.; Hui, J. H.; Prestwich, G. D.; Wijnen, A. J. V.; Nurcombe, V.; Cool, S. M. The Influence of Collagen and Hyaluronan Matrices On the Delivery and Bioactivity of Bone Morphogenetic Protein-2 and Ectopic Bone Formation. *Acta Biomaterialia* 2013, 9, 9098-9106.

(6). Zhao, J.; Shinkai, M.; Takezawa, T.; Ohba, S.; Chung, U.; Nagamune, T. Bone Regeneration Using Collagen Type I Vitrigel with Bone Morphogenetic Protein-2. *Journal of Bioscience and Bioengineering* 2009, 107, 318-323.
